# Supplementary material
Source: PubMed Central journal article supplement (PMC11421519)
Supplement: NIHMS2020990-supplement-Table_of_Materials.pdf [file NIHMS2020990-supplement-Table_of_Materials.pdf]

| <b>Name of Material/ Equipment</b>              | <b>Company</b>    | <b>Catalog Number</b>   |
|-------------------------------------------------|-------------------|-------------------------|
| XFe96 extracellular FluxPak                     | Agilent           | 102416-100 or 102601-10 |
| Cell-Tak                                        | Corning           | 354240                  |
| Sodium bicarbonate                              | Sigma-Aldrich     | S5761                   |
| XF base medium                                  | Agilent           | 102353-100              |
| 200 mM L-glutamine                              | Life Technologies | 25030-081               |
| Glucose                                         | Sigma-Aldrich     | G7528                   |
| 100 mM sodium pyruvate                          | Life Technologies | 11360-070               |
| Sodium hydroxide (NaOH)                         | Sigma-Aldrich     |                         |
| 0.2 µm filter                                   |                   |                         |
| Falcon 70 µm filter                             | Fisher Scientific | 08-771-2                |
| Gibco HBSS                                      | Fisher Scientific | 14175095                |
| Gibco Fetal bovine serum (FBS)                  | Fisher Scientific | 26400044                |
| Ammonium chloride (NH <sub>4</sub> Cl)          | Fisher Scientific | A661-3                  |
| Potassium bicarbonate (KHCO <sub>3</sub> )      | Fisher Scientific | P235-500                |
| EDTA                                            | Fisher Scientific | O2793-500               |
| Rat biotin antimouse-CD2, Clone ID: RM2-5       | Biologend         | 100103                  |
| Rat biotin antimouse-CD3, Clone ID: 17A2        | Biologend         | 100243                  |
| Rat biotin antimouse-CD5, Clone ID: 53-7.3      | Biologend         | 100603                  |
| Rat biotin antimouse-CD8, Clone ID: 53-6.7      | Biologend         | 100703                  |
| Rat biotin antimouse-Ter-119, Clone ID: TER-119 | Biologend         | 116203                  |
| Rat biotin antimouse-B220, Clone ID: RA3-6B2    | Biologend         | 103203                  |
| Rat biotin antimouse-Gr-1, Clone ID: RB6-8C5    | Biologend         | 108403                  |
| MojoSort buffer                                 | Biologend         | 480017                  |
| MojoSort Strapavidin Nanobeads                  | Biologend         | 480015                  |

|                                                              |                   |           |
|--------------------------------------------------------------|-------------------|-----------|
| 15 mL conical tubes                                          |                   |           |
| 2-Deoxy-glucose (2-DG)                                       | Sigma-Aldrich     | D8375     |
| Oligomycin                                                   | Sigma-Aldrich     | O4876     |
| Carbonyl cyanide-4 (trifluoromethoxy) phenylhydrazone (FCCP) | Sigma-Aldrich     | C2920     |
| Rotenone                                                     | Sigma-Aldrich     | R8875     |
| Antimycin A                                                  | Sigma-Aldrich     | A8674     |
| PBS                                                          | Life Technologies | 10010-049 |
| Tris-HCl                                                     | Sigma-Aldrich     |           |
| Sodium deoxycholate                                          | Sigma-Aldrich     |           |
| Sodium chloride (NaCl)                                       | Sigma-Aldrich     |           |
| Sodium Fluoride (NaF)                                        | Sigma-Aldrich     |           |
| Protease Inhibitor Cocktail (PIC)                            | Sigma-Aldrich     |           |
| Bio-Rad DC protein assay kit                                 | Sigma-Aldrich     |           |
| XF prep station                                              | Seahorse          |           |
|                                                              | Biosciences       |           |
| Seahorse XFe96 extracellular flux analyzer                   | Seahorse          |           |
|                                                              | Biosciences now   |           |
|                                                              | Agilent           |           |

### Comments/Description

Includes assay cartridges with utility plates,  
loading guide flats for loading

drugs onto the assay cartridge, XF calibrant solution and XF cell culture  
microplate

Cell adhesive. Used for coating cell microplates

Used to make Cell-Tak solution for microplate coating

Used to prepare glycolysis stress test and mitochondrial stress test assay media

Component of glycolysis stress test and mitochondrial stress test assay media

Component of mitochondrial stress test assay medium and first injection of glycolysis stress test

Component of mitochondrial stress test assay medium

Prepared 1 N solution. Used for pH normalization

Used to filter sterile the assay media

Used as cells strainer during HPCs harvest

Used to prepare assay buffer during HPCs harvest

Used to prepare assay buffer during HPCs harvest

Component of ACK lysis buffer

Component of ACK lysis buffer

Component of ACK lysis buffer and RIPA lysis buffer

Used for lineage depletion during HPC enrichment

Used for washing during HPC enrichment

Used for lineage depletion during HPC enrichment

Used during HPC enrichment and to prepare assay drug solutions

3rd drug injection during glycolysis stress test

2nd drug injection during glycolysis stress test and 1st drug injection during mitochondrial stress test

2nd drug injection during mitochondrial stress test

3rd drug injection during mitochondrial stress test

4th drug injection during mitochondrial stress test

Used to wash cells after assay for protein quantification

Component of RIPA lysis buffer

Supplied as tablets. One tablet was dissolved in 10 mL of RIPA buffer to make 1X PIC.

Used as per manufacturer instructions

Used for non-CO<sub>2</sub> 37°C incubations

For ECAR and OCR measurements in real time.
